# Supplementary material for: Quaternary ammonium-tethered hyperbranched polyurea nanoassembly synergized with antibiotics for enhanced antimicrobial efficacy
Source: Royal Society of Chemistry journal article supplement (doi:10.1039/d3bm01519j), 2023-12-29

# Quaternary Ammonium-tethered Hyperbranched Polyureas Nanoassembly Synergize with Antibiotics for Enhanced Antimicrobial Efficacy

Yanwen Feng<sup>1</sup>, Jiang Bian<sup>1</sup>, Guoyi Yu<sup>1</sup>, Pei Zhao<sup>2\*</sup>, Jun Yue<sup>1\*</sup>

<sup>1</sup>*School of Biomedical Engineering, Shenzhen Campus of Sun Yat-sen University, Shenzhen, Guangdong 518107, P. R. China.*

<sup>2</sup>*Laboratory Animal Center, Shenzhen Campus of Sun Yat-sen University, Shenzhen, Guangdong 518107, P. R. China.*

*\*Corresponding to: yuejun3@mail.sysu.edu.cn; zhaopei55@mail.sysu.edu.cn*

## Contents

|                                                                                                       |   |
|-------------------------------------------------------------------------------------------------------|---|
| Figure S1. <sup>1</sup> H NMR spectrum of HPU <sub>s</sub> .....                                      | 2 |
| Figure S2. <sup>1</sup> H NMR spectrum of HPU <sub>s</sub> -QA .....                                  | 2 |
| Figure S3. Calibration curve of rifampicin absorbance .....                                           | 3 |
| Figure S4. <sup>1</sup> H NMR spectra of Rif, FITC and FITC-labeled Rif.....                          | 3 |
| Figure S5. Distribution of HPU <sub>s</sub> -Rif <sub>FITC</sub> /QA within E. coli biofilm .....     | 4 |
| Figure S6. Cytotoxicity (left) as well as the hemocompatibility (right) of HPU <sub>s</sub> -QA ..... | 4 |

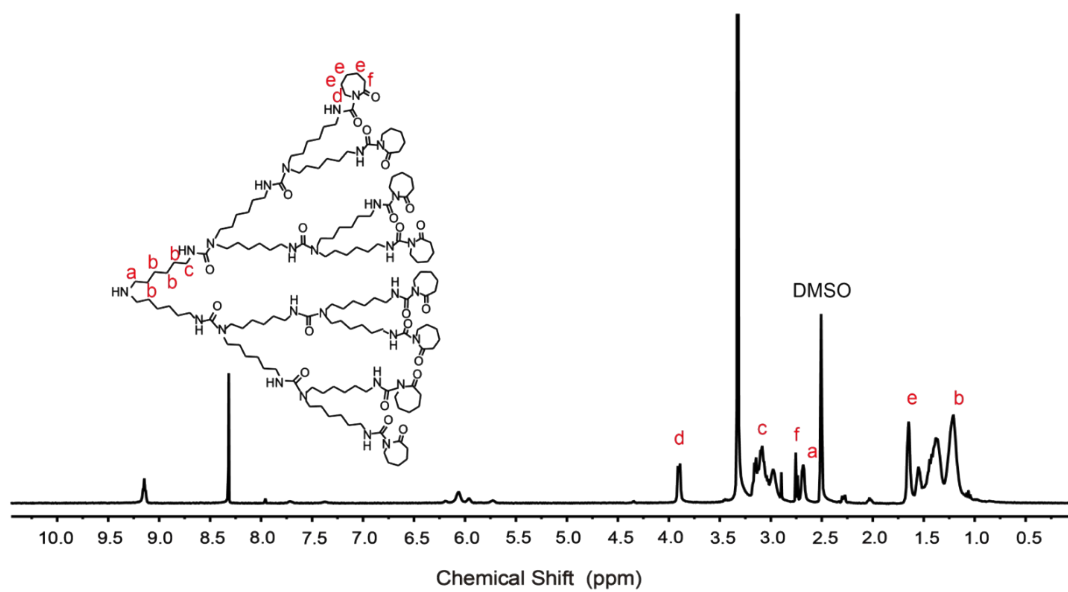

**Figure S1.** <sup>1</sup>H NMR spectrum of HPUs.

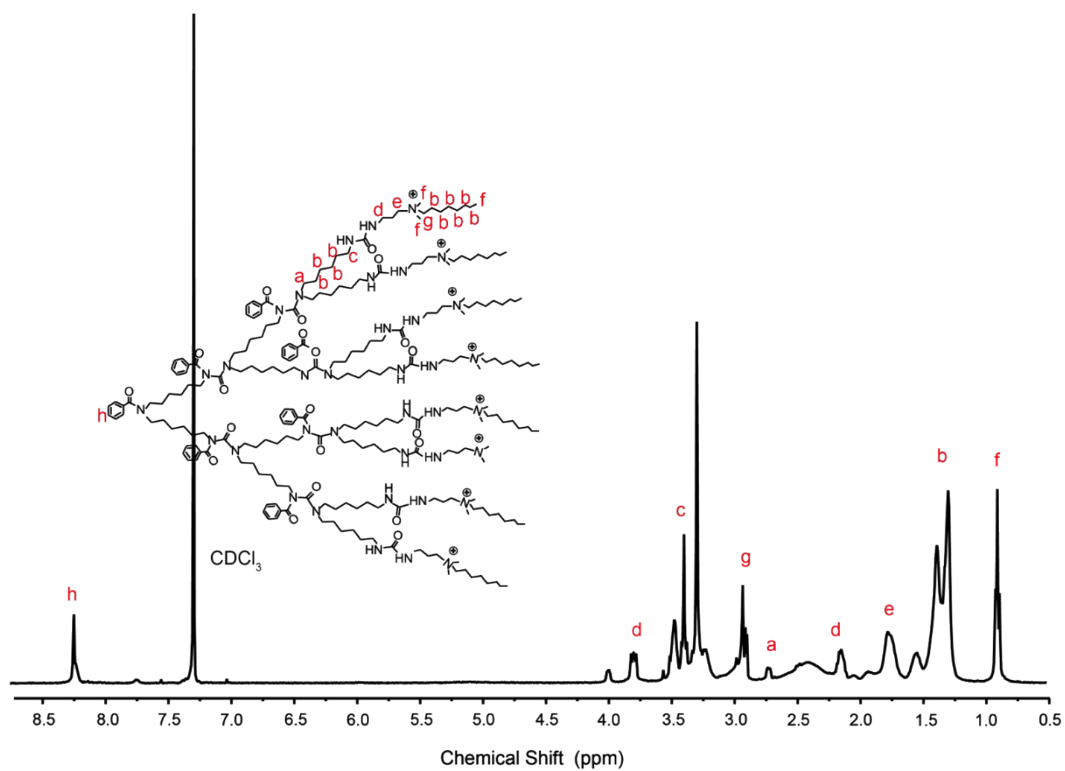

**Figure S2.** <sup>1</sup>H NMR spectrum of HPUs-QA.

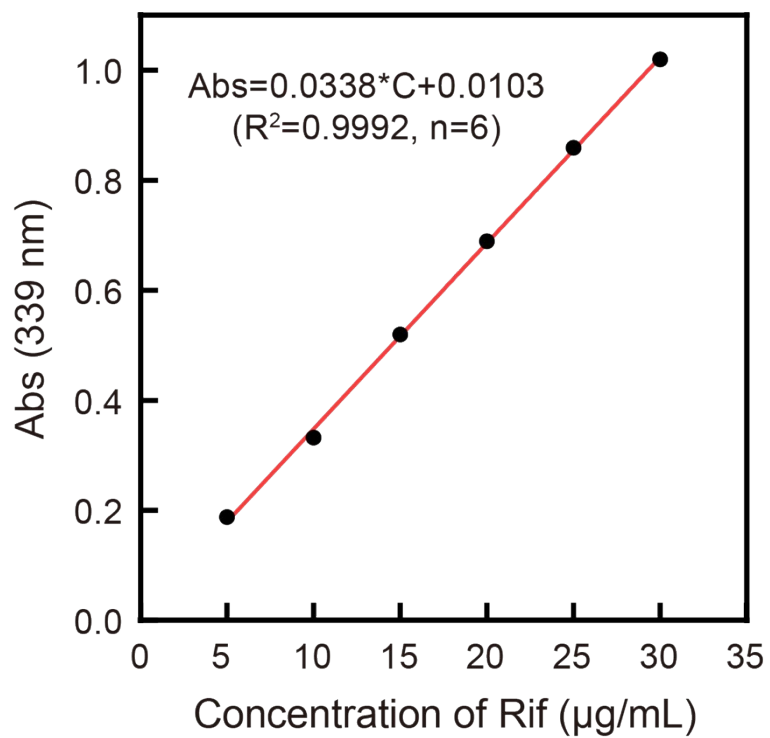

**Figure S3. Calibration curve of rifampicin absorbance as a function of standard rifampicin concentrations**

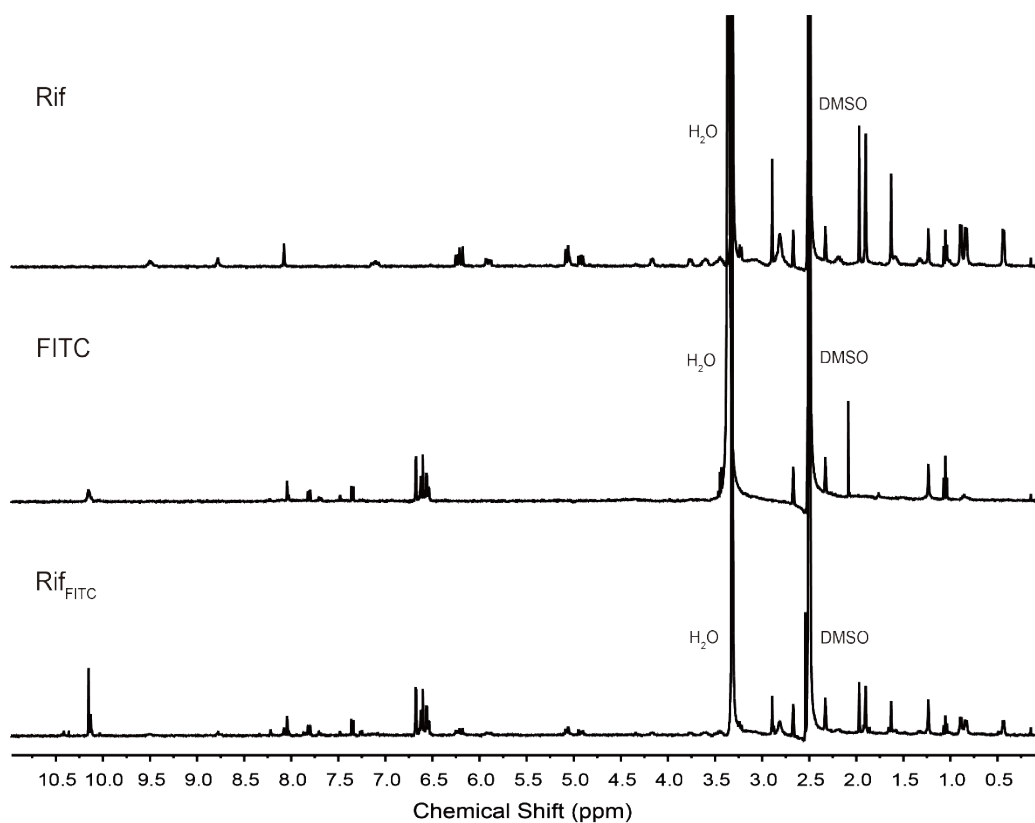

**Figure S4.  $^1\text{H}$  NMR spectra of Rif, FITC and FITC-labeled Rif.**

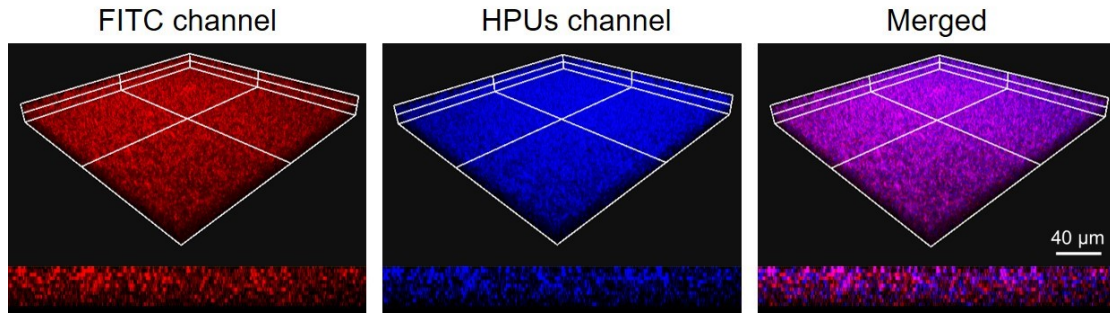

**Figure S5.** Distribution of HPUs-Rif<sub>FITC</sub>/QA within *E. coli* biofilm.

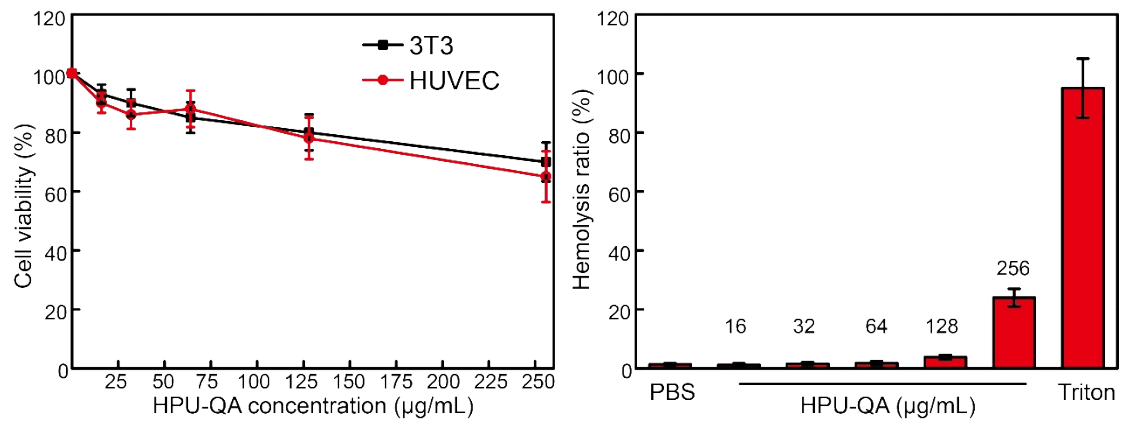

Supplement: d3bm01519j1.pdf [file d3bm01519j1.pdf]
